# Supplementary material
Source: PubMed Central journal article supplement (PMC5728420)
Supplement: NIHMS915308-supplement-1.pdf [file NIHMS915308-supplement-1.pdf]

**Figure S1**

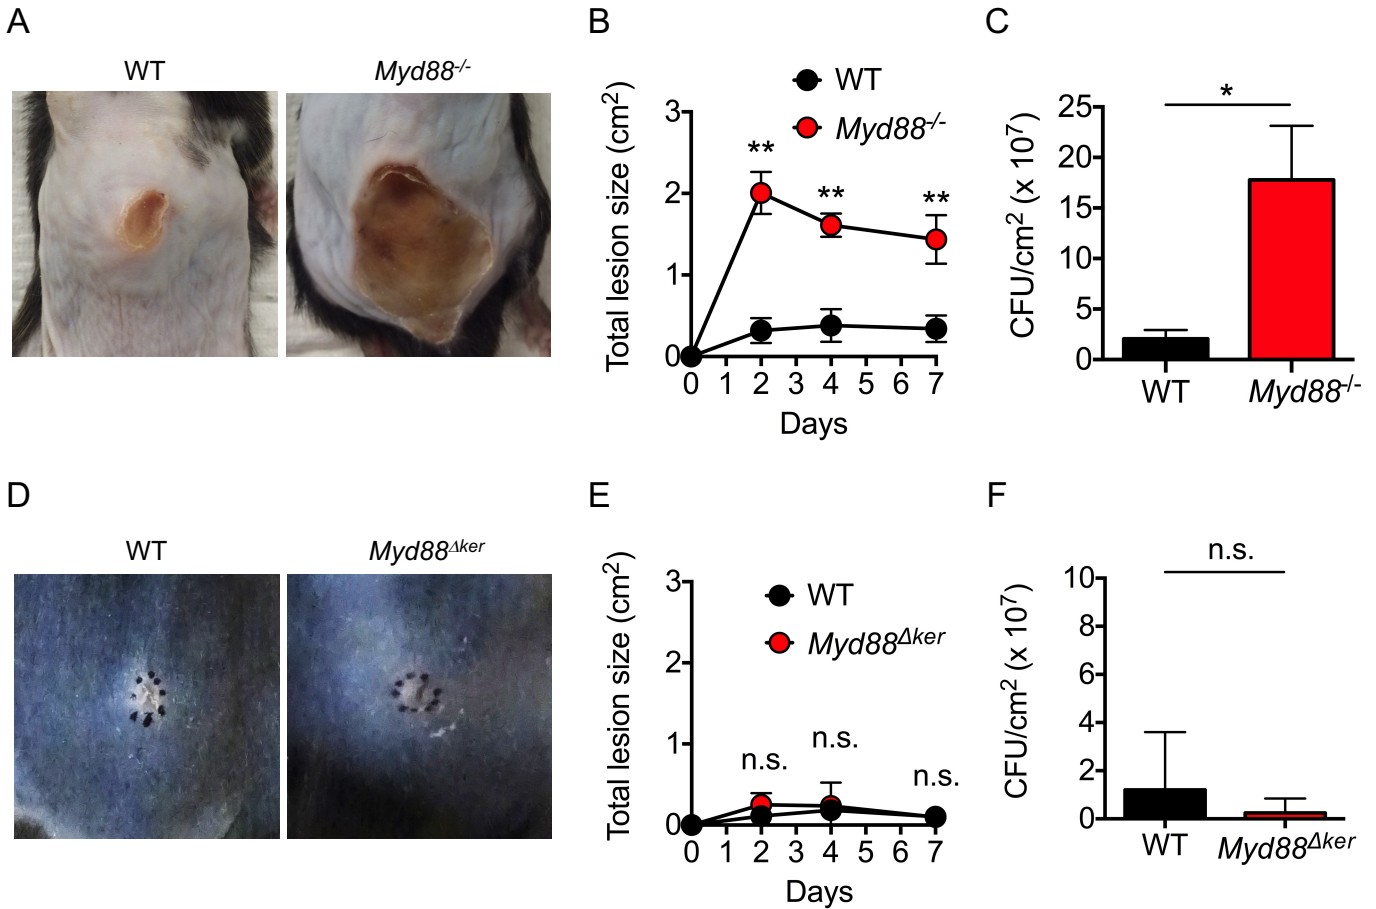

**Figure S1. *Myd88<sup>-/-</sup>* mice show increased skin lesions and pathogen loads after intradermal *S. aureus* infection. Related to Figure 1.**

**A**, WT and *Myd88<sup>-/-</sup>* mice were intradermally inoculated with *S. aureus*. Representative macroscopic images of mice colonized with *S. aureus* 7 days after infection (n=4 mice per group). **B-C**, Skin lesion size (**B**) of indicated time point. *S. aureus* CFU in the skin (**C**) of WT and *Myd88<sup>-/-</sup>* mice 7 days after infection. **D**, WT and *Myd88<sup>Δker</sup>* mice were intradermally inoculated with *S. aureus*. Representative macroscopic images of mice colonized with *S. aureus* 7 days after infection (n=4 to 7 mice per group). **E-F**, Skin lesion size (**E**) at indicated time point. *S. aureus* CFU in the skin (**F**) of WT and *Myd88<sup>Δker</sup>* mice 7 days after infection. Data are presented as mean  $\pm$  SD. Data are representative of 2 independent experiments. n.s.; not significant, \*P<0.05 and \*\*P<0.01, by unpaired two-tailed Mann-Whitney U test.

**Figure S2**

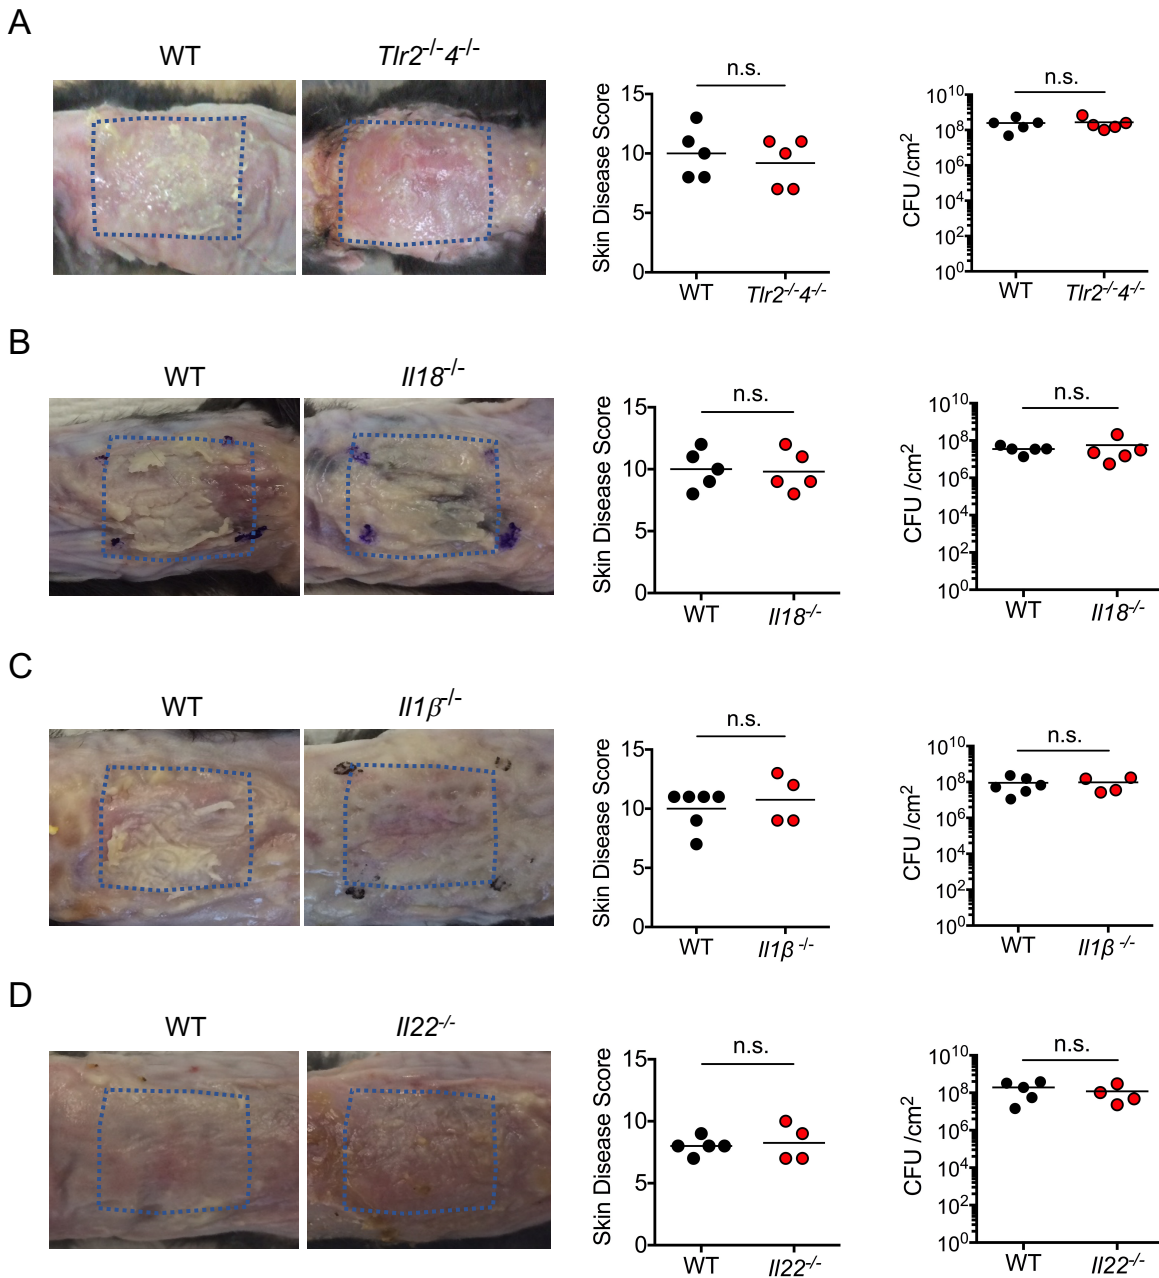

**Figure S2. TLR 2/4, IL-1b, IL-18 and IL-22 are dispensable for *S. aureus*-induced skin inflammation. Related to Figure 2-4.**

**A-D**, WT, *Tlr2<sup>-/-</sup>4<sup>-/-</sup>* (**A**), *Il18<sup>-/-</sup>* (**B**), *Il1β<sup>-/-</sup>* (**C**) and *Il22<sup>-/-</sup>* mice (**D**) were epicutaneously colonized with *S. aureus*. Representative macroscopic images, skin disease scores and *S. aureus* CFU in the skin of the mice colonized with *S. aureus* (n=4 to 11 mice per group). Each dot represents a mouse. Data are representative of at least 2 independent experiments. ND; not detected, n.s.; not significant, by unpaired two-tailed Mann-Whitney U test.

**Figure S3**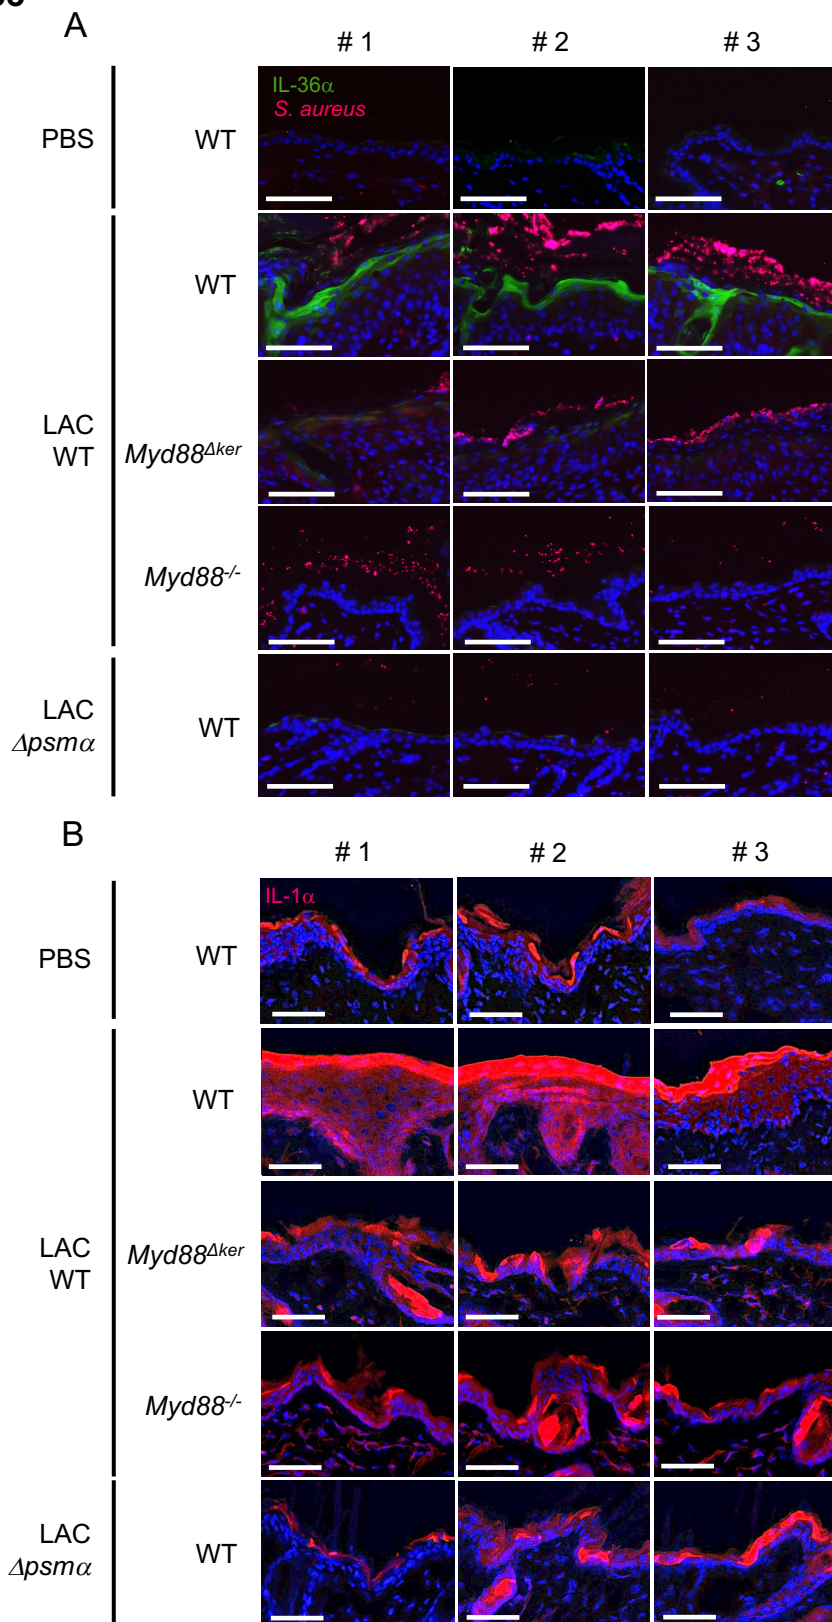

**Figure S3. Expression of IL-1 $\alpha$  and IL-36 $\alpha$  in the skin of WT, *Myd88<sup>Δker</sup>* and *Myd88<sup>-/-</sup>* mice infected epicutaneously with *S. aureus*. Related to Figure 3.**

Representative slides from the skin of 3 different mice stained with Hoechst stain (blue) and antibodies against *S. aureus* (red) and IL-36 $\alpha$  (green) (A) or Hoechst stain (blue) and antibody against IL-1 $\alpha$  (red)(B). WT, *Myd88<sup>Δker</sup>* and *Myd88<sup>-/-</sup>* mice colonized with *S. aureus* (LAC WT), WT mice with *Δpsmα* *S. aureus* (LAC *Δpsmα*) and WT mice treated with PBS are shown. Data are representative of at least 2 independent experiments. Scale bars, 50  $\mu$ m.

**Figure S4**

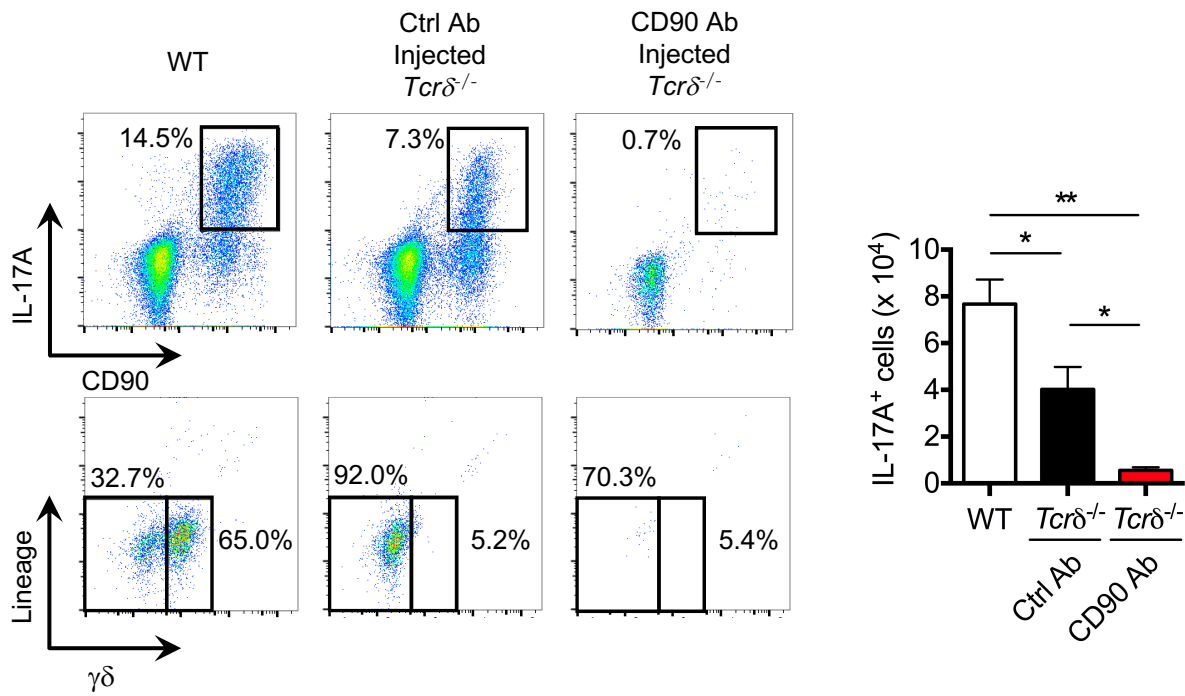

**Figure S4. Administration of anti-CD90 Ab depletes IL-17 producers in *Tcrδ*<sup>-/-</sup> mice. Related to Figure 5.**

IL-17A-producing cells were evaluated by flow cytometric analysis after epicutaneous *S. aureus* colonization in WT mice and *Tcrδ*<sup>-/-</sup> mice treated with control Ab and anti-CD90 Ab. Representative flow cytometric analysis of lineage (B220, CD11b, CD11c, Gr-1, NK1.1)-negative cells and  $\gamma\delta$  T cells was performed on gated CD45<sup>+</sup>CD90<sup>+</sup>IL-17A<sup>+</sup> skin cells (left panels) on day 7. Results in right panels represent mean  $\pm$  SD of 3 experiments. The number of IL-17A<sup>+</sup> cells in WT and *Tcrδ*<sup>-/-</sup> mice (right panels). \*P < 0.05, \*\*P < 0.01, by one-way ANOVA test with Bonferroni's correction.



## Figure S5

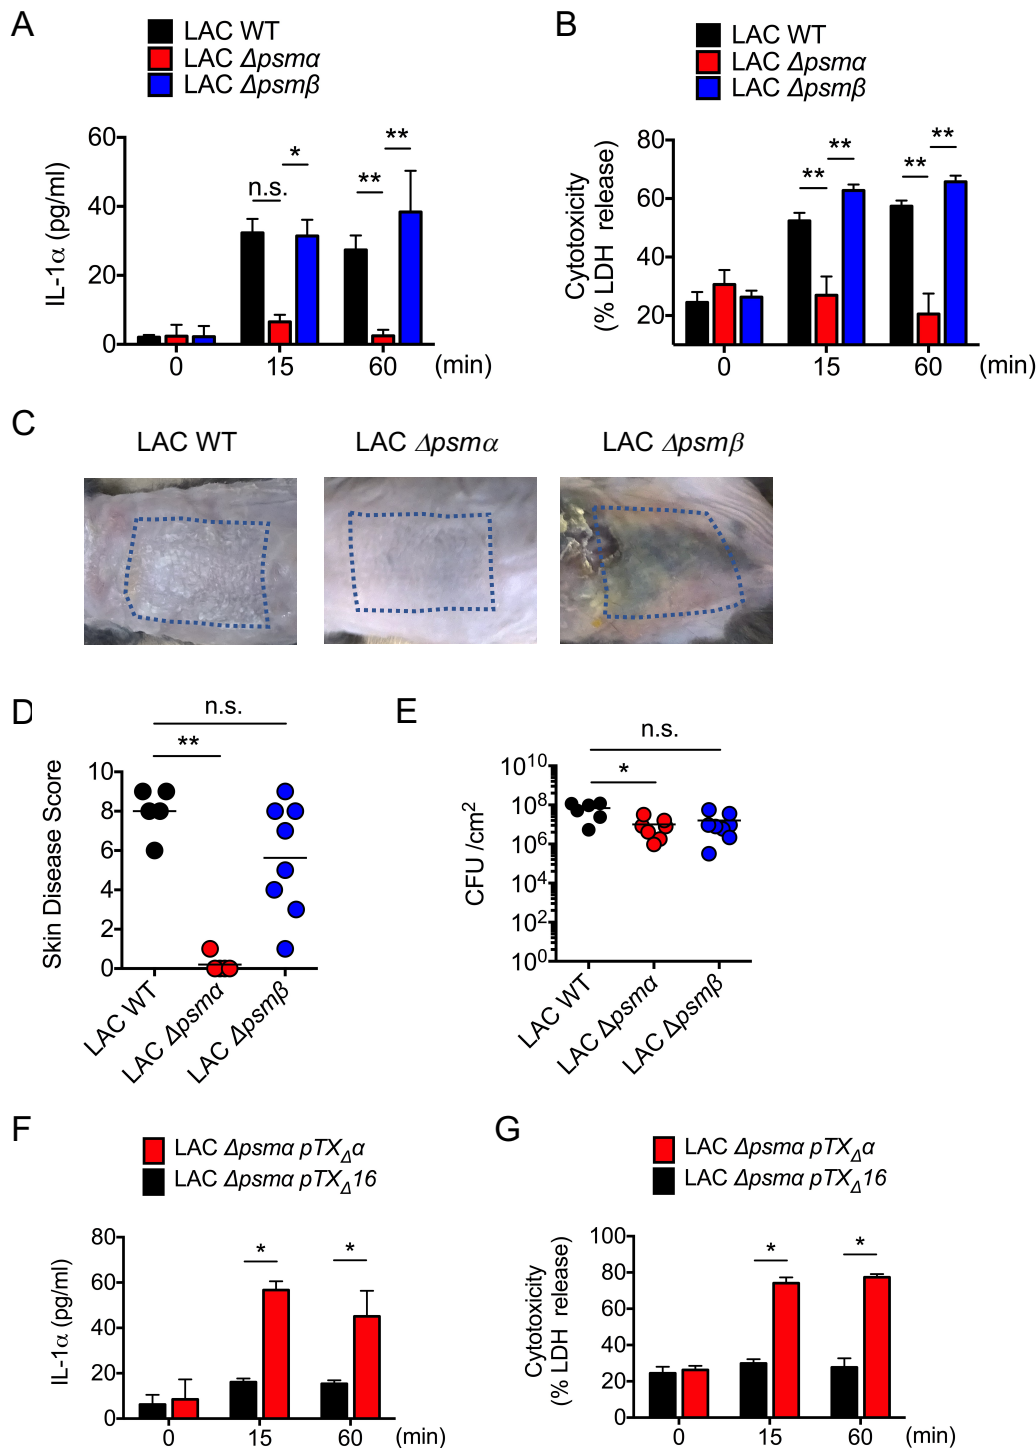

**Figure S5. *S. aureus* PSM $\alpha$ , but not PSM $\beta$ , peptides induce cell death of murine keratinocytes and mediate skin inflammation. Related to Figure 6.**

**A-B**, IL-1 $\alpha$  release (**A**) and cytotoxicity (**B**) of murine primary KCs from WT mice stimulated with culture supernatant of LAC WT, LAC  $\Delta psm\alpha$ , or LAC  $\Delta psm\beta$ . Data are representative of 3 independent experiments. **C**, Representative macroscopic images of WT mice colonized with LAC WT, LAC  $\Delta psm\alpha$ , or LAC  $\Delta psm\beta$  on day 7 after colonization. **D-E**, Skin disease scores (**D**) and *S. aureus* CFU in the skin (**E**) of infected mice. Each dot represents an individual mouse. **F-G**, IL-1 $\alpha$  release (**F**) and cytotoxicity (**G**) of murine primary KCs from WT mice stimulated with culture supernatant of  $\Delta psm\alpha$  *S. aureus* reconstituted with *psm\alpha* plasmid (LAC  $\Delta psm\alpha$  pTX $\Delta\alpha$ ) or vector (LAC  $\Delta psm\alpha$  pTX $\Delta 16$ ). Data are combined of 2 independent experiments. n.s.; not significant, \* $P < 0.05$  and \*\* $P < 0.01$  by one-way ANOVA test with Bonferroni's correction (A, B), Kruskal-Wallis test (D, E) or unpaired two-tailed Mann-Whitney U test (F, G).

## Figure S6

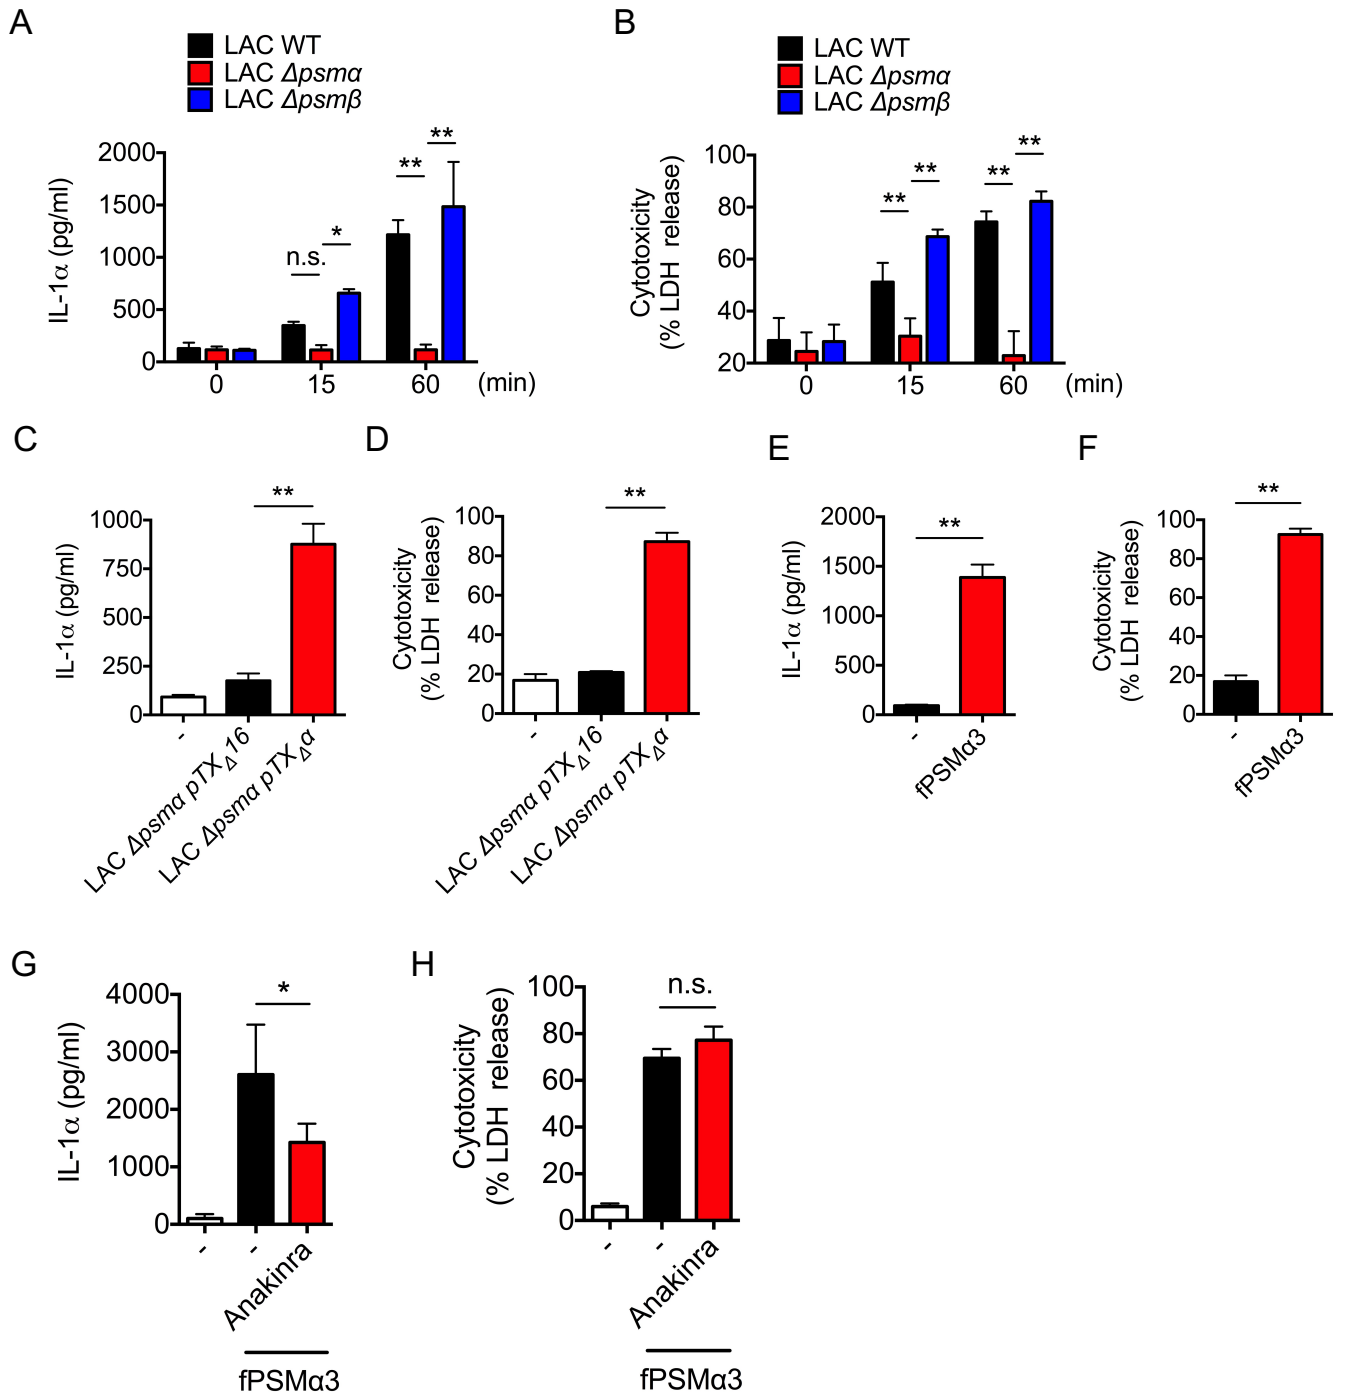

**Figure S6. *S. aureus* PSM $\alpha$  peptides induce IL-1 $\alpha$  release from human keratinocytes. Related to Figure 6.**

**A-B**, IL-1 $\alpha$  release (**A**) and cytotoxicity (**B**) of human primary KCs stimulated with culture supernatant of LAC WT, LAC  $\Delta psm\alpha$ , or LAC  $\Delta psm\beta$ . Data are representative of 3 independent experiments. **C-D**, IL-1 $\alpha$  release (**C**) and cytotoxicity (**D**) of human primary KCs stimulated with culture supernatant of  $\Delta psm\alpha$  *S. aureus* reconstituted with *psm\alpha* plasmid (LAC  $\Delta psm\alpha$  pTX $\Delta$  $\alpha$ ) or its vector (LAC  $\Delta psm\alpha$  pTX $\Delta$ 16). Data are representative of 2 independent experiments. **E-F**, IL-1 $\alpha$  release (**E**) and cytotoxicity (**F**) of human primary KCs stimulated with synthetic formylated PSM $\alpha$ 3 (fPSM $\alpha$ 3). Data are representative of 2 independent experiments. **G-H**, IL-1 $\alpha$  release (**G**), and cytotoxicity (**H**) of human primary KCs stimulated with formylated PSM $\alpha$ 3 in the presence and absence of IL-1 receptor antagonist, anakinra. Data are representative of 2 independent experiments. n.s.; not significant, \* $P < 0.05$ ; \*\* $P < 0.01$ , by Kruskal-Wallis test (A, B) or unpaired two-tailed Mann-Whitney U test (C-H).
